# Supplementary material for: AI-based histopathological classification of central nervous system tumours
Source: Research Square preprint supplement (doi:10.21203/rs.3.rs-5600492/v1), 2025-01-13
Supplement: Supplementary file 1 [file 757a40a091789ff2f3b41703.xlsx]

## Sheet: EBRAINS_class_color_code
Histology_class	Color_code	Superfamily
Glioblastoma, IDH-wildtype	#68C62D	ADG
Anaplastic astrocytoma, IDH-wildtype	#50df35	ADG
Diffuse astrocytoma, IDH-wildtype	#57bc20	ADG
Gemistocytic astrocytoma, IDH-mutant	#DDCA11	ADG
Diffuse astrocytoma, IDH-mutant	#f0bf28	ADG
Anaplastic astrocytoma, IDH-mutant	#e6cf10	ADG
Anaplastic oligodendroglioma, IDH-mutant and 1p-19q codeleted	#FFE336	ADG
Oligodendroglioma, IDH-mutant and 1p-19q codeleted	#ffd935	ADG
Glioblastoma, IDH-mutant	#FFF700	ADG
Ependymoma, RELA fusion-positive	#df6d6c	EPN
Papillary ependymoma	#B90F38	EPN
Myxopapillary ependymoma	#bf1151	EPN
Ependymoma	#FF044C	EPN
Tanycytic ependymoma	#ff0457	EPN
Anaplastic ependymoma	#ef1835	EPN
Subependymoma	#ff1a5b	EPN
Papillary meningioma	#400040	MNG
Angiomatous meningioma	#4d004d	MNG
Psammomatous meningioma	#5a005a	MNG
Chordoid meningioma	#660066	MNG
Meningothelial meningioma	#730073	MNG
Clear cell meningioma	#800080	MNG
Microcystic meningioma	#8d0d8d	MNG
Secretory meningioma	#9a1a9a	MNG
Anaplastic meningioma	#a626a6	MNG
Rhabdoid meningioma	#b333b3	MNG
Transitional meningioma	#931393	MNG
Atypical meningioma	#a020a0	MNG
Metaplastic meningioma	#ad2dad	MNG
Fibrous meningioma	#b939b9	MNG
Lymphoplasmacyte-rich meningioma	#c646c6	MNG
Pilomyxoid astrocytoma	#9D73C9	LGG/NT
Pilocytic astrocytoma	#846cd9	LGG/NT
Dysembryoplastic neuroepithelial tumour	#CB5216	LGG/NT
Rosette-forming glioneuronal tumour	#F79246	LGG/NT
Extraventricular neurocytoma	#e7b598	LGG/NT
Papillary glioneuronal tumour	#ba602b	LGG/NT
Angiocentric glioma	#E4703A	LGG/NT
Paraganglioma	#db7450	LGG/NT
Ganglioneuroma	#dc6d51	LGG/NT
Gangliocytoma	#d96623	LGG/NT
Anaplastic ganglioglioma	#f07e27	LGG/NT
Ganglioglioma	#e76639	LGG/NT
Diffuse midline glioma, H3 K27M-mutant	#a3f187	PedDHGG
Medulloblastoma, SHH-activated and TP53-wildtype	#8BC0FF	MB
Medulloblastoma, SHH-activated and TP53-mutant	#8aaef8	MB
Medulloblastoma, non-WNT-non-SHH	#6DA7D9	MB
Medulloblastoma, WNT-activated	#5aa5e4	MB
Pituitary adenoma	#137D75	TSR
Pituicytoma	#277d75	TSR
Papillary craniopharyngioma	#4bcccb	TSR
Adamantinomatous craniopharyngioma	#73edb6	TSR
Atypical teratoid-rhabdoid tumour	#006EAD	CNS_ET
Embryonal tumour with multilayered rosette, C19MC-altered	#1693D6	CNS_ET
Ewing sarcoma	#CE69EC	MNMT_CNS
Angiosarcoma	#d27fe4	MNMT_CNS
Gliosarcoma	#bb7af1	MNMT_CNS
Osteochondroma	#FA8CFF	MNMT_CNS
Chondrosarcoma	#f59ff6	MNMT_CNS
Chordoma	#ff83ff	MNMT_CNS
Haemangiopericytoma	#ED5CFC	MNMT_CNS
Haemangioma	#f05cf5	MNMT_CNS
Haemangioblastoma	#d658ff	MNMT_CNS
Hybrid nerve sheath tumours	#F7CA8A	CNPT
Malignant peripheral nerve sheath tumour	#decd77	CNPT
Neurofibroma	#ff9999	CNPT
Plexiform neurofibroma	#ec8589	CNPT
Melanotic schwannoma	#FFE1B2	CNPT
Schwannoma	#ffcdad	CNPT
Cellular schwannoma	#ffe1c0	CNPT
Control	#D3D3D3	CT
Anaplastic pleomorphic xanthoastrocytoma	#7C46C9	DGMACCA
Pleomorphic xanthoastrocytoma	#7440dd	DGMACCA
Pineoblastoma	#98eb60	PPRT
CNS ganglioneuroblastoma	#81f95f	PPRT
Papillary tumour of the pineal region	#AEDE8A	PPRT
Pineal parenchymal tumour of intermediate differentiation	#b4f79b	PPRT
Pineocytoma	#DE7B2C	PPRT
Low-grade B-cell lymphomas of the CNS	#3C1B46	HT_CNS
EBV-positive diffuse large B-cell lymphoma, NOS	#431b46	HT_CNS
Diffuse large B-cell lymphoma of the CNS	#250b35	HT_CNS
Immature teratoma	#996a4d	GCT
Osteoma	#8a663d	GCT
Mature teratoma	#a45548	GCT
Perineurioma	#c39f88	GCT
Germinoma	#c5b391	GCT
Atypical choroid plexus papilloma	#7B3E0A	CPT
Choroid plexus papilloma	#923c13	CPT
Choroid plexus carcinoma	#855912	CPT
Choriocarcinoma	#79502b	CPT
Rhabdomyosarcoma	#007BB8
Fibrosarcoma	#0085ab
Osteosarcoma	#0070be
Leiomyosarcoma	#007bce
Spindle cell oncocytoma	#AD6EF1
Subependymal giant cell astrocytoma	#b26eee
Olfactory neuroblastoma	#aa4a1c
Central neurocytoma	#B85400
Granular cell tumour of the sellar region	#c1dd8d
Metastatic tumours	#77523c
Meningeal melanoma	#b6dc95
Giant cell glioblastoma	#9df4a4
Meningeal melanocytoma	#102A46
Diffuse leptomeningeal glioneuronal tumour	#d1723a
Cerebellar liponeurocytoma	#d17421
Langerhans cell histiocytosis	#4dcc8e
Liposarcoma	#e17e33
Astroblastoma	#ded9d9
Undifferentiated pleomorphic sarcoma	#000000
Leiomyoma	#000f00
Epitheloid MPNST	#000500
Dysplastic cerebellar gangliocytoma	#00030d
Inflammatory myofibroblastic tumour	#0a0000
Desmoplastic infantile astrocytoma and ganglioglioma	#041100
Teratoma with malignant transformation	#000300
Erdheim-Chester disease	#0d1800
Juvenile xanthogranuloma	#060f09
Chordoid glioma of the third ventricle	#000009
Follicular lymphoma	#060000
Mixed germ cell tumour	#00000f
Immunodeficiency-associated CNS lymphoma	#000813
Intravascular large B-cell lymphoma	#001400
Crystal-storing histiocytosis	#020a12
Embryonal carcinoma	#011200
MALT lymphoma of the dura	#030f00
Lipoma	#001600
