# Supplementary material for: AI-based histopathological classification of central nervous system tumours
Source: Research Square preprint supplement (doi:10.21203/rs.3.rs-5600492/v1), 2025-01-13
Supplement: Supplementary file 2 [file b3e58470eb4e3920ed5c9a97.xlsx]

## Sheet: Sheet1
Molecular superfamily	Molecular subtype	Label	Label_superfamily	Abbrevation_superfamily	Abbrevation_subtype	Color_code_superfamily	Color_code_subtype
Adult-type diffuse gliomas	glioblastoma, IDH-wildtype	0	0	ADG	GBM	#bac645	#68C62D
Adult-type diffuse gliomas	Astrocytoma, IDH-mutant	3	0	ADG	A_IDH	#bac645	#DDCA11
Adult-type diffuse gliomas	Oligodendroglioma, IDH-mutant and 1p/19q-codeleted	9	0	ADG	O_IDH	#bac645	#FFE336
Adult-type diffuse gliomas	Adult-type diffuse high grade glioma, IDH-wildtype	34	0	ADG	HGG	#bac645	#7ea2ce
Adult-type diffuse gliomas	Oligosarcoma, IDH-mutant	52	0	ADG	OLIGOSARC_IDH	#bac645	#FFF700
Adult-type diffuse gliomas	High-grade diffuse glioma of the midline/posterior fossa; H3/IDH-wildtype	67	0	ADG	GBM_CBM	#bac645	#58c159
Adult-type diffuse gliomas	Anaplastic neuroepithelial tumour with condensed nuclei	76	0	ADG	ANT	#bac645	#ff9e4d
Ependymal tumours	posterior fossa ependymoma group A	1	1	EPN	EPN_PFA	#e73b5e	#ffb3cb
Ependymal tumours	supratentorial ependymoma, ZFTA fusion-positive	2	1	EPN	EPN_ST_ZFTA_FUS	#e73b5e	#df6d6c
Ependymal tumours	Myxopapillary ependymoma	13	1	EPN	EPN_MPE	#e73b5e	#B90F38
Ependymal tumours	Spinal ependymoma	22	1	EPN	EPN_SPINE	#e73b5e	#FF044C
Ependymal tumours	Posterior fossa subependymoma	30	1	EPN	EPN_PF_SE	#e73b5e	#DD052E
Ependymal tumours	posterior fossa ependymoma group B	37	1	EPN	EPN_PFB	#e73b5e	#e6657b
Ependymal tumours	spinal subependymoma	43	1	EPN	EPN_SPINE_SE	#e73b5e	#ff1a5b
Ependymal tumours	Supratentorial subependymoma	57	1	EPN	EPN_ST_SE	#e73b5e	#FF4156
Ependymal tumours	Spinal ependymoma, MYCN-amplified	77	1	EPN	EPN_SPINE_MYCN	#e73b5e	#b30033
Ependymal tumours	Supratentorial ependymoma, YAP1-fused	86	1	EPN	EPN_YAP	#e73b5e	#FE576C
meningioma	meningioma, benign	4	2	MNG	MNG_BEN	#c15cc9	#e39ae5
meningioma	meningioma, intermediate	10	2	MNG	MNG_INT	#c15cc9	#8c258d
meningioma	meningioma, malignant	47	2	MNG	MNG_MAL	#c15cc9	#e382fd
meningioma	meningioma, SMARCE1-altered	89	2	MNG	MNG_SMARCE1	#c15cc9	#b430b6
Low-grade glial/glioneuronal/neuroepithelial tumours	pilocytic astrocytoma	5	3	LGG/NT	PA	#c56d5d	#9D73C9
Low-grade glial/glioneuronal/neuroepithelial tumours	Dysembryoplastic neuroepithelial tumour	20	3	LGG/NT	DNET	#c56d5d	#CB5216
Low-grade glial/glioneuronal/neuroepithelial tumours	Ganglioglioma	28	3	LGG/NT	GG	#c56d5d	#E4703A
Low-grade glial/glioneuronal/neuroepithelial tumours	Desmoplastic infantile ganglioglioma / desmoplastic infantile astrocytoma	59	3	LGG/NT	DIG_DIA	#c56d5d	#cd4d00
Low-grade glial/glioneuronal/neuroepithelial tumours	Diffuse glioneuronal tumour with oligodendroglioma-like features and nuclear clusters	68	3	LGG/NT	DGONC	#c56d5d	#ff701a
Low-grade glial/glioneuronal/neuroepithelial tumours	Angiocentric glioma, MYB/MYBL1-altered	70	3	LGG/NT	AG_MYB	#c56d5d	#9159DE
Low-grade glial/glioneuronal/neuroepithelial tumours	Rosette-forming glioneuronal tumour	79	3	LGG/NT	RGNT	#c56d5d	#F79246
Low-grade glial/glioneuronal/neuroepithelial tumours	Extraventricular neurocytoma	82	3	LGG/NT	EVNCYT	#c56d5d	#e7b598
Low-grade glial/glioneuronal/neuroepithelial tumours	diffuse glioma, MYB- or MYBL1-altered	83	3	LGG/NT	LGG_MYB	#c56d5d	#9c6ae1
Low-grade glial/glioneuronal/neuroepithelial tumours	Myxoid glioneuronal tumour, PDGFRA-mutant	87	3	LGG/NT	MYXGNT	#c56d5d	#d47a45
Low-grade glial/glioneuronal/neuroepithelial tumours	Papillary glioneuronal tumour	88	3	LGG/NT	PGNT	#c56d5d	#ba602b
Low-grade glial/glioneuronal/neuroepithelial tumours	Polymorphous low-grade neuroepithelial tumour of the young	96	3	LGG/NT	PLNTY	#c56d5d	#914b22
Paediatric-type diffuse high-grade gliomas	Diffuse paediatric-type high grade glioma	8	4	PedDHGG	pedHGG	#78ce73	#19cd19
Paediatric-type diffuse high-grade gliomas	Diffuse midline glioma, H3 K27-altered	15	4	PedDHGG	DMG_K27	#78ce73	#a3f187
Paediatric-type diffuse high-grade gliomas	Diffuse hemispheric glioma, H3 G34-mutant	39	4	PedDHGG	DHG_G34	#78ce73	#55C056
Paediatric-type diffuse high-grade gliomas	Infant-type hemispheric glioma	41	4	PedDHGG	IHG	#78ce73	#d0bbd8
Medulloblastoma	medulloblastoma, SHH-activated	7	5	MB	MB_SHH	#61aaeb	#8BC0FF
Medulloblastoma	medulloblastoma Group 4	12	5	MB	MB_G4	#61aaeb	#1566d0
Medulloblastoma	medulloblastoma Group 3	18	5	MB	MB_G3	#61aaeb	#bad5f8
Medulloblastoma	Medulloblastoma, WNT activated	42	5	MB	MB_WNT	#61aaeb	#6DA7D9
Medulloblastoma	Medullomyoblastoma	92	5	MB	MB_MYO	#61aaeb	#1fb1f9
tumours of the sellar region	Pituitary adenoma	6	6	TSR	PITAD	#48c0bb	#137D75
tumours of the sellar region	Papillary craniopharyngioma	19	6	TSR	CPH_PAP	#48c0bb	#43DAD7
tumours of the sellar region	Adamantinomatous craniopharyngioma	23	6	TSR	CPH_ADM	#48c0bb	#72D4C8
tumours of the sellar region	Pituicytoma, granular cell tumour of the sellar region, and spindle-cell oncocytoma	33	6	TSR	PITUI	#48c0bb	#58D8DB
Other CNS embryonal tumours	Atypical teratoid rhabdoid tumour	11	7	CNS_ET	ATRT	#3e8ac2	#006EAD
Other CNS embryonal tumours	embryonal tumour with multilayered rosettes	25	7	CNS_ET	ETMR	#3e8ac2	#1693D6
Other CNS embryonal tumours	CNS neuroblastoma, FOXR2-altered	64	7	CNS_ET	CNS_NB_FOXR2	#3e8ac2	#518ccb
Other CNS embryonal tumours	CNS tumour with BCOR internal tandem duplication	84	7	CNS_ET	CNS_BCOR_ITD	#3e8ac2	#739ACA
Other CNS embryonal tumours	CNS Embryonal tumour with PLAG-family amplification	90	7	CNS_ET	ET_PLAG	#3e8ac2	#315581
Other CNS embryonal tumours	CNS tumour with EP300:BCOR(L1) fusion	98	7	CNS_ET	CNS_BCOR_FUS	#3e8ac2	#5987c0
Other CNS embryonal tumours	CNS embryonal tumour with BRD4:LEUTX fusion	100	7	CNS_ET	ET_BRD4_LEUTX	#3e8ac2	#51c3fa
Mesenchymal, non-meningothelial tumours involving the CNS	Chordoma	21	9	MNMT_CNS	CHORDM	#d869e6	#FA8CFF
Mesenchymal, non-meningothelial tumours involving the CNS	Ewing sarcoma	26	9	MNMT_CNS	EWS	#d869e6	#CE69EC
Mesenchymal, non-meningothelial tumours involving the CNS	Haemangioblastoma	38	9	MNMT_CNS	HMB	#d869e6	#ED5CFC
Mesenchymal, non-meningothelial tumours involving the CNS	Solitary fibrous tumour / haemangiopericytoma	49	9	MNMT_CNS	SFT_HMPC	#d869e6	#FF6DFA
Mesenchymal, non-meningothelial tumours involving the CNS	CIC-rearranged sarcoma	61	9	MNMT_CNS	CNS_SARC_CIC	#d869e6	#955C9D
Mesenchymal, non-meningothelial tumours involving the CNS	Primary intracranial sarcoma, DICER1-mutant	72	9	MNMT_CNS	CNS_SARC_DICER	#d869e6	#cb61eb
Cranial and paraspinal nerve tumours	Malignant melanotic nerve sheath tumour	14	8	CPNT	MMNST	#fbaa73	#F7CA8A
Cranial and paraspinal nerve tumours	Plexiform neurofibroma	36	8	CPNT	NFIB_PLEX	#fbaa73	#ff9999
Cranial and paraspinal nerve tumours	Schwannoma	55	8	CPNT	SCHW	#fbaa73	#FFE1B2
Cranial and paraspinal nerve tumours	Cauda equina neuroendocrine tumour [paraganglioma], subtype non-CIMP	80	8	CPNT	CAUDEQU_NET	#fbaa73	#F5811D
Cranial and paraspinal nerve tumours	CNS Schwannoma, VGLL-fused	91	8	CPNT	CNS_SCHW_VGLL	#fbaa73	#ff904d
Control tissues	control tissue	17	10	CT	CTRL	#d5d5d5	#D3D3D3
Control tissues	Control tissue, reactive tumour microenvironment	27	10	CT	CTRL_REACTIVE	#d5d5d5	#D7D7D7
diffuse glioma, MAPK altered, cell-cycle activated	Pleomorphic xanthoastrocytoma	16	11	DGMACCA	PXA	#7748b9	#7C46C9
diffuse glioma, MAPK altered, cell-cycle activated	High-grade astrocytoma with piloid features	50	11	DGMACCA	HGAP	#7748b9	#734ba9
Pineal parenchymal and retinal tumours	Pineoblastoma, miRNA pathway altered, group 1	35	12	PPRT	PB_GRP1	#a4d288	#cbf5af
Pineal parenchymal and retinal tumours	Pineoblastoma	45	12	PPRT	PB	#a4d288	#98eb60
Pineal parenchymal and retinal tumours	Pineal parenchymal tumour of intermediate differentiation	56	12	PPRT	PPTID	#a4d288	#b4f79b
Pineal parenchymal and retinal tumours	Pineal retinoblastoma	78	12	PPRT	PIN_RB	#a4d288	#b6dc95
Pineal parenchymal and retinal tumours	Retinoblastoma, MYCN-activated	99	12	PPRT	RB_MYCN	#e65900	#e65900
Pineal parenchymal and retinal tumours	normal pineal gland and pineocytoma	106	12	PPRT	NORM_PIN_CYT	#a4d288	#696969
Haematolymphoid tumours involving the CNS	Primary diffuse large B cell lymphoma of the CNS	24	13	HT_CNS	DLBCL	#4e5c67	#3C1B46
Haematolymphoid tumours involving the CNS	Plasmacytoma of the CNS	63	13	HT_CNS	PLASMACYT	#4e5c67	#632F63
Haematolymphoid tumours involving the CNS	Langerhans cell histiocytosis	95	13	HT_CNS	LCH	#4e5c67	#4dcc8e
Germ cell tumours	Teratoma	51	14	GCT	GCT_TERA	#9b735b	#996a4d
Germ cell tumours	Germinoma	53	14	GCT	GCT_GERM	#9b735b	#c39f88
Germ cell tumours	Yolk sac tumour	74	14	GCT	GCT_YOLKSAC	#9b735b	#77523c
choroid plexus tumours	choroid plexus papilloma	31	16	CPT	CPP	#783f18	#7B3E0A
neuroblastoma	Neuroblastoma, subtype TMM negative	32	15	NB	NB_TMM_NEG	#65b398	#62b799
choroid plexus tumours	choroid plexus carcinoma	62	16	CPT	CPC	#783f18	#754027
neuroblastoma	Neuroblastoma, MYCN subtype	71	15	NB	NB_MYCN	#65b398	#85c7b0
neuroblastoma	Neuroblastoma, subtype ALT/TERT TMM positive	85	15	NB	NB_TMM_POS	#65b398	#489d80
rhabdomyosarcoma	Rhabdomyosarcoma	29	17	RMS	RMS	#007bb8	#007BB8
Circumscribed astrocytic tumours	Subependymal giant cell astrocytoma	48	18	CAT	SEGA	#b075ee	#AD6EF1
Circumscribed astrocytic tumours	Chordoid glioma, PRKCA-mutant	66	18	CAT	CHGL	#b075ee	#B37DEC
Inflammatory microenvironment	Inflammatory microenvironment	46	19	INFLAM_ENV	INFLAM_ENV	#dbdbdb	#DBDBDB
esthesioneuroblastoma	Olfactory neuroblastoma	40	20	ONB	ONB	#aa4a1c	#aa4a1c
high-grade neuroepithelial tumour with MN1:BEND2 fusion	Astroblastoma, MN1-altered, MN1:BEND2-fused	44	21	ABM_MN1	ABM_MN1	#ab94c1	#AB94C1
Metastases to the CNS	Melanoma [metastatic]	54	22	MET_MEL	MET_MEL	#0b4068	#0B4068
Neuroepithelial tumour with PATZ1 fusion	Neuroepithelial tumour with PATZ1 fusion	65	23	NET_PATZ1	NET_PATZ1	#233d5c	#233d5c
central neurocytoma	Central neurocytoma	58	24	CN	CN	#b85400	#B85400
Pineal tumours	papillary tumour of the pineal region	60	25	PTPR	PTPR	#aede8a	#AEDE8A
Melanocytic tumours	Melanocytoma	73	26	MELN	MELN	#102a46	#102A46
diffuse glioneuronal tumours	Diffuse leptomeningeal glioneuronal tumour	75	27	DLGNT	DLGNT	#d1723a	#d1723a
liponeurocytoma	Liponeurocytoma	97	30	LIPN	LIPN	#de7b2c	#DE7B2C
Sinonasal undifferentiated carcinoma, IDH2-mutant	Sinonasal undifferentiated carcinoma, IDH2-mutant	69	28	SNUC-IDH2	SNUC_IDH2	#ff8339	#ff8339
Neuroepithelial tumour, PLAGL1-fused	Neuroepithelial tumour, PLAGL1-fused	81	29	NET_PLAG1_FUS	NET_PLAGL1_FUS	#e60019	#e60019
high-grade neuroepithelial tumour with MN1:CXXC5 fusion	Neuroepithelial tumour, MN1:CXXC5-fused	93	31	NET_CXXC5	NET_CXXC5	#8d6eab	#8d6eab
intraocular medulloepithelioma	Intraocular medulloepithelioma	94	33	IO_MEPL	IO_MEPL	#46bcd2	#46bcd2
